# Supplementary material for: Evaporation-induced sintering of liquid metal droplets with biological nanofibrils for flexible conductivity and responsive actuation
Source: PubMed Central journal article supplement (PMC6683165; doi:10.1038/s41467-019-11466-5), 2019-08-05
Supplement: 41467_2019_11466_MOESM3_ESM.pdf [file 41467_2019_11466_MOESM3_ESM.pdf]

## Description of Additional Supplementary Files

File Name: Supplementary Movie 1

Description: Top and smooth mirror-like bottom surfaces of EGaIn layer on glass after evaporation-induced sintering.

File Name: Supplementary Movie 2

Description: Voltage-driven actuating behaviors of Janus film at different voltages (RH ~70%).

File Name: Supplementary Movie 3

Description: Voltage-driven actuating of Janus film simulating predatory motion of cabbages (RH ~70%).

File Name: Supplementary Movie 4

Description: Self-twisting of Janus film driven by NIR radiation (808 nm,  $0.8 \text{ W cm}^{-2}$  and RH ~70%).

File Name: Supplementary Movie 5

Description: Self-folding of origami driven by NIR radiation (808 nm,  $0.8 \text{ W cm}^{-2}$  and RH ~70%).

File Name: Supplementary Movie 6

Description: Floating motion of Janus film driven by NIR radiation (808 nm,  $0.8 \text{ W cm}^{-2}$ ) on water surface.
